# Supplementary material for: Potential Drug-Drug Interactions in Patients With Urinary Tract Infections: A Contributing Factor in Patient and Medication Safety
Source: Front Pharmacol. 2019 Sep 17;10:1032. doi: 10.3389/fphar.2019.01032 (PMC6758591; doi:10.3389/fphar.2019.01032)
Supplement: Supplementary file 2 [file Table_2.docx]

**SUPPLEMENTARY TABLE 2** Most frequently prescribed antimicrobial agents among patients with UTIs

| **Class of drugs (ATC code)a** | **Drugs** | **Frequency** |
| --- | --- | --- |
| Second, third, and fourth generation cephalosporins (J01DCb, J01DDc, J01DEd) | Cefoperazone | 260 |
| Ceftriaxone | 137 |
| Cefpodoxime | 27 |
| Cefepime | 24 |
| Cefixime | 11 |
| Cefotaxime | 10 |
| Cefuroxime | 1 |
| Ceftazidime | 1 |
| Beta-lactam antibacterial, penicillin (J01C) | Sulbactam | 258 |
| Amoxicillin | 21 |
| Piperacillin | 14 |
| Ampicillin | 11 |
| Cloxacillin | 10 |
| Tazobactam | 1 |
| Benzyl penicillin | 1 |
| Antimalarial (P01B) | Artesunate | 119 |
| Quinine | 12 |
| Lumefantrine | 9 |
| Artemether | 9 |
| Chloroquine | 2 |
| Primaquine | 1 |
| Hydroxychloroquine | 1 |
| Drugs for treatment of tuberculosis (J04A) | Rifampin | 19 |
| Pyrazinamide | 19 |
| Isoniazid | 19 |
| Ethambutol | 18 |
| Streptomycin | 4 |
| Intestinal anti-infective (A07A) | Metronidazole | 44 |
| Rifaximin | 16 |
| Vancomycin | 3 |
| Miconazole | 3 |
| Moxifloxacin | 6 |
| Levofloxacin | 2 |
| Ofloxacin | 1 |
| Norfloxacin | 1 |

-ATC, anatomical therapeutic chemical classification

-a Drugs were grouped in accordance with the Anatomical Therapeutic Chemical Classification System.

-b J01DC ATC code is for second generation cephalosporin.

-c J01DD ATC code is for third generation cephalosporin.

-d J01DE ATC code is for fourth generation cephalosporin.
